# Supplementary material for: Camellia sinensis L. Alleviates Pulmonary Inflammation Induced by Porcine Pancreas Elastase and Cigarette Smoke Extract
Source: MDPI journal article supplement (doi:10.3390/antiox11091683), 2022-08-28
Supplement: s1 [file s1]

**Table S1.** Evaluation of quality and quantity parameters of RNA samples

| Sample     | 260/2680 | RNA (ng/ $\mu$ L) | 600 ng ( $\mu$ L) | DW ( $\mu$ L) |
|------------|----------|-------------------|-------------------|---------------|
| CON1       | 2.075    | 110.132           | 5.4               | 14.6          |
| CON2       | 2.111    | 120.855           | 5.0               | 15.0          |
| CON3       | 2.1      | 117.165           | 5.1               | 14.9          |
| CON4       | 2.084    | 92.753            | 6.5               | 13.5          |
| CSE+LPS1   | 2.114    | 126.913           | 4.7               | 15.3          |
| CSE+LPS2   | 2.072    | 93.456            | 6.4               | 13.6          |
| CSE+LPS3   | 2.092    | 103.845           | 5.8               | 14.2          |
| CSE+LPS4   | 2.081    | 96.319            | 6.2               | 13.8          |
| CLE 12.5-1 | 2.085    | 84.154            | 7.1               | 12.9          |
| CLE 12.5-2 | 2.073    | 113.517           | 5.3               | 14.7          |
| CLE 12.5-3 | 2.096    | 98.36             | 6.1               | 13.9          |
| CLE 12.5-4 | 2.067    | 79.728            | 7.5               | 12.5          |
| CLE 25-1   | 2.07     | 89.1              | 6.7               | 13.3          |
| CLE 25-2   | 2.093    | 91.406            | 6.6               | 13.4          |
| CLE 25-3   | 2.087    | 82.098            | 7.3               | 12.7          |
| CLE 25-4   | 2.119    | 86.301            | 7.0               | 13.0          |

**Table S2.** A set of primers of Mucin

|                                    | Primer sequence                                                                        | Annealing Temperature ( $^{\circ}$ C) | Cycle | Amplicon size |
|------------------------------------|----------------------------------------------------------------------------------------|---------------------------------------|-------|---------------|
| MUC5AC<br>(Accession : KC800812)   | Forward, 5'-<br>CCACTGGTTCTATGGCAACACC-3'<br>Reverse, 5'-<br>GCCGAAGTCCAGGCTGTGCG-3'   | 60 $^{\circ}$ C                       | 40    | 313           |
| MUC5B<br>(Accession : NM_002458.3) | Forward, 5'-<br>CTGCTACGACAAGGACGGAAAC-3'<br>Reverse, 5'-<br>AAGGCTGTGAGCGCACTGGATG-3' | 60 $^{\circ}$ C                       | 40    | 112           |
| SDHA<br>(Accession : KR710499.1)   | Forward, 5'-<br>TGGGAACAAGAGGGCATCTG-3'<br>Reverse, 5'-<br>CCACCACTCATCAAATTCATG-3'    | 60 $^{\circ}$ C                       | 40    | 85            |
